# Supplementary material for: Biosorption of cadmium by a lipid extraction residue of lipid-rich microalgae
Source: Royal Society of Chemistry journal article supplement (doi:10.1039/c5ra27264e), 2016-01-01
Supplement: c5ra27264e1.pdf [file c5ra27264e1.pdf]

## Supplementary Data

### Biosorption of cadmium by lipid extraction residue of lipid-rich microalgae

Heshan Zheng,<sup>a</sup> Wanqian Guo,<sup>\*a</sup> Shuo Li,<sup>a</sup> Qinglian Wu,<sup>a</sup> Renli Yin,<sup>a</sup> Xiaochi Feng,<sup>a</sup> Juanshan Du,<sup>a</sup> Nanqi Ren<sup>a</sup> and Jo-Shu Chang <sup>\*a, b</sup>

#### Medium components

The microalgae strains were grown on modified BG-11 (½N in BG-11 medium) for pre-culture, which consist of (g L<sup>-1</sup>): NaNO<sub>3</sub>, 0.75; CaCl<sub>2</sub>·2H<sub>2</sub>O, 0.036; MgSO<sub>4</sub>·7H<sub>2</sub>O, 0.075; K<sub>2</sub>HPO<sub>4</sub>, 0.03; Na<sub>2</sub>CO<sub>3</sub>, 0.02; Citric acid, 0.006; Ammonium ferric citrate, 0.006; EDTA·2Na, 0.001; H<sub>3</sub>BO<sub>3</sub>, 0.00286; ZnSO<sub>4</sub>·7H<sub>2</sub>O, 0.00022; MnCl<sub>2</sub>·4H<sub>2</sub>O, 0.00181; Na<sub>2</sub>MoO<sub>4</sub>·2H<sub>2</sub>O, 0.00039; CuSO<sub>4</sub>·5H<sub>2</sub>O, 0.000079; Co(NO<sub>3</sub>)<sub>2</sub>·6H<sub>2</sub>O, 0.000049.
